# Supplementary material for: SWISS MADE: Standardized WithIn Class Sum of Squares to Evaluate Methodologies and Dataset Elements
Source: PubMed Central journal article supplement (PMC2845619; doi:10.1371/journal.pone.0009905), 2010-03-26
Supplement: pone.0009905.s002.pdf [file pone.0009905.s002.pdf]

Dataset I: Single Channel Design

|           |      | Clustering |          |
|-----------|------|------------|----------|
|           |      | 1          | 2        |
| Phenotype | ER + | 10 (33%)   | 20 (67%) |
|           | ER - | 2 (22%)    | 7 (78%)  |

Dataset I: Reference Design

|           |      | Clustering |          |
|-----------|------|------------|----------|
|           |      | 1          | 2        |
| Phenotype | ER + | 10 (33%)   | 20 (67%) |
|           | ER - | 9 (100%)   | 0        |

Dataset II: Single Channel Design

|           |      | Clustering |          |
|-----------|------|------------|----------|
|           |      | 1          | 2        |
| Phenotype | ER + | 26 (96%)   | 1 (4%)   |
|           | ER - | 5 (20%)    | 20 (80%) |

Dataset II: Reference Design

|           |      | Clustering |          |
|-----------|------|------------|----------|
|           |      | 1          | 2        |
| Phenotype | ER + | 26 (96%)   | 1 (4%)   |
|           | ER - | 5 (20%)    | 20 (80%) |

Dataset III: Single Channel Design

|           |        | Clustering |         |
|-----------|--------|------------|---------|
|           |        | 1          | 2       |
| Phenotype | Tumor  | 7 (88%)    | 1 (13%) |
|           | Normal | 2 (25%)    | 6 (75%) |

Dataset III: Reference Design

|           |        | Clustering |         |
|-----------|--------|------------|---------|
|           |        | 1          | 2       |
| Phenotype | Tumor  | 7 (88%)    | 1 (13%) |
|           | Normal | 2 (25%)    | 6 (75%) |

Contingency tables of biological phenotype and consensus cluster as shown for datasets I-III. Percentages are the proportion of the phenotype in a consensus cluster.
