# Supplementary material for: SWISS MADE: Standardized WithIn Class Sum of Squares to Evaluate Methodologies and Dataset Elements
Source: PubMed Central journal article supplement (PMC2845619; doi:10.1371/journal.pone.0009905), 2010-03-26
Supplement: pone.0009905.s003.pdf [file pone.0009905.s003.pdf]

| Dataset     | No. Genes | Design         | Phenotype SWISS | Cluster SWISS | Sig. Diff? |
|-------------|-----------|----------------|-----------------|---------------|------------|
| Dataset I   | 800       | Single Channel | 0.946           | 0.896         | No         |
|             |           | Reference      | 0.928           | 0.913         | No         |
| Dataset II  | 2000      | Single Channel | 0.886           | 0.840         | Yes        |
|             |           | Reference      | 0.880           | 0.821         | Yes        |
| Dataset III | 4000      | Single Channel | 0.818           | 0.712         | No         |
|             |           | Reference      | 0.803           | 0.674         | No         |

SWISS scores of datasets I – III of Experimental Application I when classifying samples according to their biological phenotype and their Consensus clustering classifications. We also report the number of genes included in the analysis after filtering based on Median Absolute Deviation (MAD), and whether there is a significant difference between the phenotype SWISS and the clustering SWISS scores.
